# Supplementary material
Source: PubMed Central journal article supplement (PMC3075767)
Supplement: pp.110.162412_1.pdf [file pp.110.162412_1.pdf]

**Supplemental Figure S1.** Rapid disappearance of exogenous cyanide in vitro. A, Disappearance of cyanide in agar medium by exposure to air. One mL of 1 mM KCN solution was added onto the surface of PDA (30 mL in volume) in a Petri dish. The Petri dish without the cover was exposed to the current of air for 30 min at 25°C in a clean bench to evaporate excess water, and a disc of the PDA (80 mm<sup>2</sup>) was prepared immediately (0 time) or after the indicated time intervals. The agar disc was quickly conducted for the measurement of cyanide. B, Enhanced disappearance of cyanide in a solution with detached rice leaves. Ten mL of 0.5 mM KCN solution was incubated in a glass tube with (red closed circles) or without (red open circles) twelve detached Nipponbare leaves whose bases were put into the solution. An aliquot of the solution was harvested at the indicated time intervals after incubation at 25°C, and used immediately for the measurement of cyanide. Black open circles show the data of water alone with detached leaves. Cyanide content is shown as a ratio of the concentration of cyanide at time zero set to 100%. Values are means  $\pm$  SD (n=3).
